# Supplementary material
Source: publisher figshare collection journal article supplement (https://rs.figshare.com/ndownloader/files/26051603)
Supplement: Supplementary file 1 [file 26051603]

## Sheet: Radiocarbon ages
Native biodiversity collapse in the Eastern Mediterranean
Radiocarbon ages
Paolo G. Albano1, Jan Steger1, Marija Bošnjak1,2, Beata Dunne1, Zara Guifarro1, Elina Turapova1, Quan Hua3, Darrell S. Kaufman4, Gil Rilov5, Martin Zuschin1
1 Department of Paleontology, University of Vienna, Althanstrasse 14, 1090 Vienna, Austria
2 Croatian Natural History Museum, Demetrova 1, Zagreb, Croatia
3 Australian Nuclear Science and Technology Organisation, Kirrawee DC, NSW 2232, Australia
4 School of Earth and Sustainability, Northern Arizona University, Flagstaff, Arizona 86011 USA
5 National Institute of Oceanography, Israel Oceanographic and Limnological Research (IOLR), Haifa 3108001, Israel
Specimen_code	Species	Station	Fraction_modern	FM_SD	D14C_per_mill	D14c_SD	uncalib_age	uncalib_age_SD	age_BP_median	age_BP_2sigma_min	age_BP_2sigma_max	age_AD	age_before_collection	Collecting_year
RC108	Donax semistriatus	SG10	0.841595	0.00430653	-158.405	4.30653	1385	45	929	748	1114	1021	995	2016
RC109	Donax semistriatus	SG10	1.01257	0.00540504	12.571	5.40504	Modern		-12	-12	-11	1962	54	2016
RC110	Donax semistriatus	SG10	0.814055	0.00372912	-185.945	3.72912	1655	40	1203	1033	1351	747	1269	2016
RC111	Donax semistriatus	SG10	0.872511	0.00475568	-127.489	4.75568	1095	45	655	514	801	1295	721	2016
RC112	Donax semistriatus	SG10	0.81309	0.00334206	-186.91	3.34206	1660	35	1213	1045	1354	737	1279	2016
RC113	Donax semistriatus	SG10	1.01801	0.00652201	18.0078	6.52201	Modern		-12	-67	-11	1962	54	2016
RC114	Donax semistriatus	SG10	1.00546	0.00371847	5.46134	3.71847	Modern		-11	-12	-11	1961	55	2016
RC115	Donax semistriatus	SG10	0.867593	0.00495842	-132.407	4.95842	1140	50	697	549	869	1253	763	2016
RC116	Donax semistriatus	SG10	0.601522	0.00317384	-398.478	3.17384	4085	45	4122	3898	4361	-2172	4188	2016
RC117	Donax semistriatus	SG10	1.01967	0.00537134	19.6688	5.37134	Modern		-12	-67	-11	1962	54	2016
RC118	Donax semistriatus	SG10	0.878916	0.00355066	-121.084	3.55066	1035	35	605	498	722	1345	671	2016
RC119	Donax semistriatus	SG10	0.602267	0.00354593	-397.733	3.54593	Modern		4107	3879	4352	-2157	4173	2016
RC120	Donax semistriatus	SG10	1.02865	0.00531414	28.646	5.31414	Modern		-64	-67	-12	2014	2	2016
RC121	Donax semistriatus	SG10	1.00816	0.00494665	8.15911	4.94665	Modern		-12	-12	-11	1962	54	2016
RC122	Donax semistriatus	SG10	1.01483	0.00501307	14.8268	5.01307	Modern		-12	-13	-11	1962	54	2016
RC123	Corbula gibba	SG20	0.768561	0.00513972	-231.439	5.13972	2110	60	1692	1497	1899	258	1758	2016
RC124	Corbula gibba	SG20	0.866924	0.00514074	-133.076	5.14074	1145	50	703	554	875	1247	769	2016
RC125	Corbula gibba	SG20	1.01267	0.00694649	12.6739	6.94649	Modern		-12	-67	-11	1962	54	2016
RC126	Corbula gibba	SG20	0.935315	0.00687624	-64.6855	6.87624	540	60	162	-4	326	1788	228	2016
RC127	Corbula gibba	SG20	0.825974	0.00551293	-174.026	5.51293	1540	60	1088	919	1258	862	1154	2016
RC128	Corbula gibba	SG20	0.581885	0.00522304	-418.115	5.22304	4350	80	4491	4230	4786	-2541	4557	2016
RC129	Corbula gibba	SG20	1.01249	0.00602352	12.4863	6.02352	Modern		-12	-13	-11	1962	54	2016
RC130	Corbula gibba	SG20	0.900277	0.00641045	-99.7229	6.41045	840	60	460	297	610	1490	526	2016
RC131	Corbula gibba	SG20	1.07495	0.00848611	74.9539	8.48611	Modern		-41	-48	-14	1991	25	2016
RC132	Corbula gibba	SG20	0.597238	0.00598492	-402.762	5.98492	4140	90	4202	3912	4488	-2252	4268	2016
RC133	Corbula gibba	SG20	0.787759	0.00505274	-212.241	5.05274	1920	60	1463	1289	1661	487	1529	2016
RC134	Corbula gibba	SG20	0.763742	0.00577979	-236.258	5.77979	2170	70	1751	1535	1963	199	1817	2016
RC135	Corbula gibba	SG20	1.00821	0.00833294	8.21043	8.33294	Modern		-12	-66	-10	1962	54	2016
RC136	Corbula gibba	SG20	0.578232	0.00602772	-421.768	6.02772	4400	90	4561	4276	4825	-2611	4627	2016
RC137	Corbula gibba	SG20	0.994659	0.0073002	-5.34099	7.3002	40	60	-11	-12	-9	1961	55	2016
RC138	Striarca lactea	NG10	1.12832	0.00538177	128.319	5.38177	Modern		-22	-26	-18	1972	44	2016
RC139	Striarca lactea	NG10	1.02833	0.00513978	28.3302	5.13978	Modern		-64	-67	-12	2014	2	2016
RC140	Striarca lactea	NG10	1.10813	0.0051361	108.126	5.1361	Modern		-30	-34	-16	1980	36	2016
RC141	Striarca lactea	NG10	1.0616	0.00691441	61.5971	6.91441	Modern		-46	-54	-13	1996	20	2016
RC142	Striarca lactea	NG10	0.910981	0.00811316	-89.0192	8.11316	750	80	378	146	538	1572	444	2016
RC143	Striarca lactea	NG10	1.0597	0.00525727	59.7008	5.25727	Modern		-47	-53	-13	1997	19	2016
RC144	Striarca lactea	NG10	1.05228	0.00679477	52.2829	6.79477	Modern		-51	-62	-13	2001	15	2016
RC145	Striarca lactea	NG10	1.04538	0.00559865	45.3822	5.59865	Modern		-56	-64	-13	2006	10	2016
RC146	Striarca lactea	NG10	1.07712	0.00561981	77.1223	5.61981	Modern		-41	-45	-14	1991	25	2016
RC147	Striarca lactea	NG10	0.973683	0.007918	-26.3171	7.918	210	70	-6	-11	129	1956	60	2016
RC148	Striarca lactea	NG10	1.05631	0.00685277	56.3054	6.85277	Modern		-49	-59	-13	1999	17	2016
RC149	Striarca lactea	NG10	1.04427	0.00681166	44.271	6.81166	Modern		-56	-66	-13	2006	10	2016
RC150	Striarca lactea	NG10	1.08596	0.00685663	85.9584	6.85663	Modern		-38	-43	-15	1988	28	2016
RC151	Striarca lactea	NG10	1.03173	0.00644048	31.7294	6.44048	Modern		-62	-67	-12	2012	4	2016
RC152	Striarca lactea	NG10	1.08614	0.00525744	86.1408	5.25744	Modern		-38	-42	-15	1988	28	2016
RC153	Corbula gibba	NG30	1.03738	0.00519381	37.3796	5.19381	Modern		-61	-67	-12	2011	5	2016
RC154	Corbula gibba	NG30	1.04235	0.00461005	42.3494	4.61005	Modern		-58	-66	-13	2008	8	2016
RC155	Corbula gibba	NG30	0.912487	0.00657502	-87.5127	6.57502	740	60	370	148	522	1580	436	2016
RC156	Corbula gibba	NG30	0.925407	0.00481849	-74.5933	4.81849	625	45	256	-1	434	1694	322	2016
RC157	Corbula gibba	NG30	0.891617	0.00538232	-108.383	5.38232	920	50	529	390	662	1421	595	2016
RC158	Corbula gibba	NG30	1.06288	0.00542429	62.8792	5.42429	Modern		-46	-51	-13	1996	20	2016
RC159	Corbula gibba	NG30	1.08815	0.00583364	88.1451	5.83364	Modern		-37	-42	-15	1987	29	2016
RC160	Corbula gibba	NG30	1.00384	0.00511433	3.84194	5.11433	Modern		-11	-12	-11	1961	55	2016
RC161	Corbula gibba	NG30	1.02548	0.00649085	25.4849	6.49085	Modern		-63	-67	-12	2013	3	2016
RC162	Corbula gibba	NG30	0.940997	0.00668128	-59.0031	6.68128	490	60	125	-5	269	1825	191	2016
RC163	Corbula gibba	NG30	1.02539	0.00570944	25.3857	5.70944	Modern		-64	-67	-12	2014	2	2016
RC164	Corbula gibba	NG30	1.0855	0.00737335	85.4961	7.37335	Modern		-38	-43	-14	1988	28	2016
RC165	Corbula gibba	NG30	0.906379	0.00557438	-93.6205	5.57438	790	50	413	267	540	1537	479	2016
RC166	Corbula gibba	NG30	1.03138	0.00632078	31.3809	6.32078	Modern		-62	-67	-12	2012	4	2016
RC167	Corbula gibba	NG30	0.799538	0.00702403	-200.462	7.02403	1800	80	1351	1159	1560	599	1417	2016
RC168	Corbula gibba	SG40	1.0696	0.00565379	69.6008	5.65379	Modern		-43	-48	-14	1993	23	2016
RC169	Corbula gibba	SG40	1.06699	0.0050286	66.9895	5.0286	Modern		-44	-49	-14	1994	22	2016
RC171	Corbula gibba	SG40	0.932617	0.00606913	-67.3825	6.06913	560	60	180	-3	359	1770	246	2016
RC172	Corbula gibba	SG40	0.92248	0.00511637	-77.52	5.11637	650	45	289	80	461	1661	355	2016
RC174	Corbula gibba	SG40	0.927345	0.00574316	-72.6554	5.74316	605	50	232	-1	418	1718	298	2016
RC175	Corbula gibba	SG40	1.04136	0.00574445	41.363	5.74445	Modern		-58	-66	-13	2008	8	2016
RC176	Corbula gibba	SG40	1.03718	0.00631188	37.1845	6.31188	Modern		-60	-67	-12	2010	6	2016
RC177	Corbula gibba	SG40	0.916091	0.00938165	-83.9085	9.38165	700	90	340	90	520	1610	406	2016
RC178	Corbula gibba	SG40	0.902121	0.00833193	-97.8794	8.33193	830	80	444	277	617	1506	510	2016
RC179	Corbula gibba	SG40	1.05958	0.0053548	59.5823	5.3548	Modern		-47	-53	-13	1997	19	2016
RC180	Corbula gibba	SG40	0.90518	0.00591126	-94.8197	5.91126	800	60	422	268	552	1528	488	2016
RC181	Corbula gibba	SG40	1.03854	0.0042726	38.5414	4.2726	Modern		-60	-66	-13	2010	6	2016
RC182	Corbula gibba	SG40	1.0533	0.00399071	53.303	3.99071	Modern		-50	-56	-13	2000	16	2016
RC183	Corbula gibba	SG30	0.712006	0.00338459	-287.994	3.38459	2730	40	2454	2285	2689	-504	2520	2016
RC184	Corbula gibba	SG30	0.845862	0.00418842	-154.138	4.18842	1345	40	881	713	1052	1069	947	2016
RC185	Corbula gibba	SG30	0.793618	0.00333253	-206.382	3.33253	1855	35	1404	1262	1559	546	1470	2016
RC186	Corbula gibba	SG30	0.77863	0.00398956	-221.37	3.98956	2010	45	1573	1379	1769	377	1639	2016
RC187	Corbula gibba	SG30	0.933313	0.00557915	-66.6871	5.57915	555	50	175	-3	351	1775	241	2016
RC188	Corbula gibba	SG30	0.668432	0.00299409	-331.568	2.99409	3235	40	3047	2837	3255	-1097	3113	2016
RC189	Corbula gibba	SG30	1.08783	0.00966148	87.8296	9.66148	Modern		-37	-44	-14	1987	29	2016
RC190	Corbula gibba	SG30	0.926254	0.00468715	-73.7462	4.68715	615	45	246	-1	425	1704	312	2016
RC191	Corbula gibba	SG30	0.846251	0.00455922	-153.749	4.55922	1340	45	877	705	1050	1073	943	2016
RC192	Corbula gibba	SG30	0.932747	0.00396753	-67.2528	3.96753	560	35	178	-2	322	1772	244	2016
RC193	Corbula gibba	SG30	0.76137	0.00411275	-238.63	4.11275	2190	45	1779	1579	1971	171	1845	2016
RC194	Corbula gibba	SG30	0.76646	0.00473625	-233.54	4.73625	2135	50	1718	1523	1911	232	1784	2016
RC195	Corbula gibba	SG30	0.557494	0.0060347	-442.506	6.0347	4690	90	4946	4652	5268	-2996	5012	2016
RC196	Corbula gibba	SG30	0.772209	0.00325612	-227.791	3.25612	2075	35	1649	1475	1843	301	1715	2016
RC197	Corbula gibba	SG30	0.870837	0.00463153	-129.163	4.63153	1110	45	669	525	823	1281	735	2016
RC204	Corbula gibba	SG40	0.930437	0.0041661	-69.5631	4.1661	580	40	198	-2	361	1752	264	2016
RC205	Corbula gibba	SG40	0.937848	0.0040769	-62.1523	4.0769	515	35	141	-3	270	1809	207	2016
RC235	Striarca lactea	S14	1.01197	0.00421417	11.9707	4.21417	MODERN		-12	-11	-12	1962	56	2018
RC236	Striarca lactea	S14	1.03556	0.00653445	35.5584	6.53445	MODERN		-61	-12	-67	2011	7	2018
RC237	Striarca lactea	S14	1.04388	0.00679193	43.8759	6.79193	MODERN		-57	-13	-66	2007	11	2018
RC238	Striarca lactea	S14	0.956547	0.00411404	-43.4535	4.11404	355	35	53	225	-7	1897	121	2018
RC239	Striarca lactea	S14	1.01808	0.00427032	18.0783	4.27032	MODERN		-12	-11	-13	1962	56	2018
RC240	Striarca lactea	S14	1.03026	0.00447316	30.2645	4.47316	MODERN		-64	-12	-67	2014	4	2018
RC241	Striarca lactea	S14	1.00197	0.00474732	1.97092	4.74732	MODERN		-11	-10	-12	1961	57	2018
RC242	Striarca lactea	S14	1.05319	0.0048133	53.1936	4.8133	MODERN		-50	-13	-57	2000	18	2018
RC243	Striarca lactea	S14	1.0502	0.00491936	50.2012	4.91936	MODERN		-52	-13	-61	2002	16	2018
RC244	Striarca lactea	S14	1.01696	0.00434312	16.9554	4.34312	MODERN		-12	-11	-13	1962	56	2018
RC245	Striarca lactea	S12	1.01566	0.00471201	15.6586	4.71201	MODERN		-12	-11	-13	1962	56	2018
RC246	Striarca lactea	S12	1.01248	0.00451648	12.4829	4.51648	MODERN		-12	-11	-12	1962	56	2018
RC247	Striarca lactea	S12	1.0162	0.00602538	16.2026	6.02538	MODERN		-12	-11	-67	1962	56	2018
RC248	Striarca lactea	S12	1.01624	0.00601634	16.2391	6.01634	MODERN		-12	-11	-67	1962	56	2018
RC249	Striarca lactea	S12	1.0192	0.00526184	19.2042	5.26184	MODERN		-12	-11	-67	1962	56	2018
RC250	Striarca lactea	S12	1.02145	0.00440974	21.447	4.40974	MODERN		-12	-11	-67	1962	56	2018
RC251	Striarca lactea	S12	1.05827	0.00721763	58.2677	7.21763	MODERN		-48	-13	-58	1998	20	2018
RC252	Striarca lactea	S12	1.01378	0.00472679	13.7798	4.72679	MODERN		-12	-11	-12	1962	56	2018
RC253	Striarca lactea	S12	1.00926	0.00560447	9.25614	5.60447	MODERN		-12	-11	-12	1962	56	2018
RC254	Striarca lactea	S12	1.02134	0.00516043	21.3352	5.16043	MODERN		-12	-11	-67	1962	56	2018
RC265	Striarca lactea	S13	0.995317	0.0069726	-4.68284	6.9726	40	60	-11	-9	-12	1961	57	2018
RC266	Striarca lactea	S13	1.0175	0.00482573	17.4976	4.82573	MODERN		-12	-11	-13	1962	56	2018
RC267	Striarca lactea	S13	1.02151	0.00428593	21.5083	4.28593	MODERN		-12	-11	-67	1962	56	2018
RC268	Striarca lactea	S13	1.05272	0.00516825	52.7196	5.16825	MODERN		-51	-13	-59	2001	17	2018
RC269	Striarca lactea	S13	1.08878	0.00646995	88.7806	6.46995	MODERN		-37	-15	-42	1987	31	2018
RC270	Striarca lactea	S13	1.03423	0.00455313	34.2272	4.55313	MODERN		-62	-12	-67	2012	6	2018
RC271	Striarca lactea	S13	1.08751	0.00981785	87.5142	9.81785	Modern		-37	-14	-44	1987	31	2018
RC272	Striarca lactea	S13	1.05049	0.0066378	50.4933	6.6378	Modern		-52	-13	-63	2002	16	2018
RC273	Striarca lactea	S13	1.01086	0.0089599	10.8587	8.9599	Modern		-12	-9	-67	1962	56	2018
RC274	Striarca lactea	S13	1.09736	0.00824437	97.3634	8.24437	Modern		-33	-15	-40	1983	35	2018
RC275	Striarca lactea	S16	1.02242	0.00600508	22.4234	6.00508	Modern		-60	-11	-67	2010	8	2018
RC276	Striarca lactea	S16	0.990173	0.00772846	-9.8267	7.72846	80	70	-10	-8	-12	1960	58	2018
RC277	Striarca lactea	S16	1.03024	0.00832814	30.2354	8.32814	Modern		-61	-12	-67	2011	7	2018
RC278	Striarca lactea	S16	0.992193	0.00650581	-7.80744	6.50581	60	60	-10	-9	-12	1960	58	2018
RC279	Striarca lactea	S16	1.00567	0.00947769	5.66514	9.47769	Modern		-11	-9	-66	1961	57	2018
RC280	Striarca lactea	S16	1.03213	0.00801873	32.127	8.01873	Modern		-61	-12	-67	2011	7	2018
RC281	Striarca lactea	S16	1.03096	0.00943251	30.9556	9.43251	Modern		-61	-12	-67	2011	7	2018
RC282	Striarca lactea	S16	1.06859	0.00639475	68.5892	6.39475	Modern		-44	-14	-49	1994	24	2018
RC283	Striarca lactea	S16	0.690987	0.0105491	-309.013	10.5491	2970	130	2734	3065	2349	-784	2802	2018
RC284	Striarca lactea	S16	1.04355	0.0078239	43.5527	7.8239	Modern		-57	-13	-66	2007	11	2018
RC315	Corbula gibba	TG80	0.689195	0.0034926	-310.805	3.4926	2990	45	2766	2955	2541	-816	2832	2016
RC316	Corbula gibba	TG80	0.784877	0.00374579	-215.123	3.74579	1945	40	1493	1682	1324	457	1559	2016
RC317	Corbula gibba	TG80	0.872189	0.00436968	-127.811	4.36968	1100	45	657	799	517	1293	723	2016
RC318	Corbula gibba	TG80	0.844109	0.00433738	-155.891	4.33738	1360	45	901	1074	721	1049	967	2016
RC319	Corbula gibba	TG80	0.882115	0.00545533	-117.885	5.45533	1010	50	588	717	471	1362	654	2016
RC320	Corbula gibba	TG80	0.923629	0.00416106	-76.3713	4.16106	640	40	278	450	76	1672	344	2016
RC321	Corbula gibba	TG80	0.878957	0.00445065	-121.043	4.45065	1035	45	605	729	492	1345	671	2016
RC322	Corbula gibba	TG80	0.849165	0.00487999	-150.835	4.87999	1315	50	849	1020	682	1101	915	2016
RC323	Corbula gibba	TG80	0.82135	0.00402181	-178.65	4.02181	1580	40	1132	1277	962	818	1198	2016
RC324	Corbula gibba	TG80	0.624049	0.00330317	-375.951	3.30317	3790	45	3727	3947	3527	-1777	3793	2016
RC325	Striarca lactea	RC16	1.0445	0.00493806	44.5031	4.93806	Modern		-56	-13	-64	2006	12	2018
RC326	Striarca lactea	RC16	0.960985	0.0067652	-39.0148	6.7652	320	60	51	226	-9	1899	119	2018
RC327	Striarca lactea	RC16	1.02323	0.00507877	23.2278	5.07877	Modern		-13	-12	-67	1963	55	2018
RC328	Striarca lactea	RC16	1.03001	0.00450343	30.0087	4.50343	Modern		-64	-12	-67	2014	4	2018
RC329	Striarca lactea	RC16	1.05516	0.00450176	55.1623	4.50176	Modern		-49	-13	-55	1999	19	2018
RC330	Striarca lactea	RC16	0.781541	0.00389102	-218.459	3.89102	1980	40	1536	1720	1345	414	1604	2018
RC331	Striarca lactea	RC16	0.92258	0.00396849	-77.4196	3.96849	645	35	289	458	93	1661	357	2018
RC332	Striarca lactea	RC16	1.06107	0.00472786	61.0656	4.72786	Modern		-46	-13	-51	1996	22	2018
RC333	Striarca lactea	RC16	1.06482	0.00435644	64.8208	4.35644	Modern		-45	-14	-49	1995	23	2018
